# Supplementary material for: Pairwise additivity in the nuclear magnetic resonance interactions of atomic xenon
Source: Royal Society of Chemistry journal article supplement (doi:10.1039/b821907a), 2009-01-01
Supplement: b821907a.pdf [file b821907a.pdf]

**Supporting information for**  
**Pairwise additivity in the nuclear magnetic resonance interactions**  
**of atomic xenon**

Matti Hanni<sup>a,b</sup>, Perttu Lantto<sup>a</sup>, and Juha Vaara<sup>b\*</sup>

<sup>1</sup>*NMR Research Group, Department of Physical Sciences,  
P.O. Box 3000, FIN-90014 University of Oulu, Finland*

<sup>2</sup>*Laboratory of Physical Chemistry, Department of Chemistry,  
P.O. Box 55 (A. I. Virtasen aukio 1),  
FIN-00014 University of Helsinki, Finland*

(Dated: January 14, 2009)

---

\*E-mail: [matti.hanni@oulu.fi](mailto:matti.hanni@oulu.fi), [perttu.lantto@oulu.fi](mailto:perttu.lantto@oulu.fi), [juha.t.vaara@helsinki.fi](mailto:juha.t.vaara@helsinki.fi)

Atomic coordinates (in Å) of xenon clusters Xe<sub>n</sub> ( $n = 2 - 12$ ).<sup>a</sup>

| $n$ | Atom number | $x$                 | $y$                 | $z$                 |
|-----|-------------|---------------------|---------------------|---------------------|
| 2   | 1           | 0.0000000000000000  | 0.0000000000000000  | 2.1813500000000000  |
|     | 2           | 0.0000000000000000  | 0.0000000000000000  | -2.1813500000000000 |
| 3   | 1           | 1.7067990866484800  | 0.4301002933603940  | -1.8017304647473800 |
|     | 2           | -2.0152973775612500 | 1.4964571188079400  | 0.2087500252235240  |
|     | 3           | 0.3084982909127710  | -1.9265574121683300 | 1.5929804395238500  |
| 4   | 1           | -1.4055765760193000 | 0.1709826193103080  | 2.2655093814598800  |
|     | 2           | 0.9739699451344120  | 2.4072748233361300  | -0.6275531554172890 |
|     | 3           | -1.5868552554260500 | -0.8597881380812930 | -1.9697903598471400 |
|     | 4           | 2.0184618859222700  | -1.7184693045651500 | 0.3318341341932210  |
| 5   | 1           | -1.0123827656385500 | 2.8618520080369900  | 1.8372784281401600  |
|     | 2           | 1.0123813905156600  | -2.8618533664469700 | -1.8372788486836800 |
|     | 3           | -1.6110112740047000 | -1.4196641721432300 | 1.3236469755527100  |
|     | 4           | -0.7556300460532800 | 1.1051789634464600  | -2.1378588931906400 |
|     | 5           | 2.3666426951808800  | 0.3144865671067540  | 0.8142123381814460  |
| 6   | 1           | 2.8878366672163200  | 1.0290505186847700  | -0.1821223134153450 |
|     | 2           | -2.8878368401755300 | -1.0290508855915000 | 0.1821201216917730  |
|     | 3           | 0.7685126221408810  | -1.7285116552650400 | 2.4193691232454100  |
|     | 4           | -0.7685146401278970 | 1.7285123082346400  | -2.4193681022030600 |
|     | 5           | -0.7081648280747600 | 2.3205622959173900  | 1.8828703000317500  |
|     | 6           | 0.7081670190209870  | -2.3205625819802700 | -1.8828691289618600 |
| 7   | 1           | -3.7015989340488600 | 0.0618193329747526  | -0.3267966147808660 |
|     | 2           | -0.9829326455734090 | 3.3419932741947700  | -1.2951276543309600 |
|     | 3           | -1.3047751558655600 | -3.3037857306214400 | 1.0931738055483900  |
|     | 4           | 3.0941083031624800  | 2.0036436650060300  | -0.4736415538529350 |
|     | 5           | 2.8952029319855400  | -2.1036715590984200 | 1.0023929039780700  |
|     | 6           | -0.1718437812773930 | 0.7594581044586500  | 2.0901455821315100  |
|     | 7           | 0.1718392808398610  | -0.7594570865256770 | -2.0901464690818900 |

<sup>a</sup> For Xe<sub>2</sub>,  $R_e$  is taken from R. A. Aziz and M. J. Slaman, Mol. Phys. **57**, 825 (1986), and for the other clusters, the Lennard-Jones geometries of<sup>2</sup>M. Hoare and P. Pal, Adv. Phys. **20**, 161 (1971), are used.

(Table continued.)

| <i>n</i> | Atom number | <i>x</i>            | <i>y</i>                         | <i>z</i>            |
|----------|-------------|---------------------|----------------------------------|---------------------|
| 8        | 1           | 1.0614601989969600  | 4.4579284143243300               | -1.2902286103381400 |
|          | 2           | -1.8379684650414500 | -2.4189745158343500              | 2.9788680393762100  |
|          | 3           | -3.7571162175575800 | -0.9301150248621570              | -0.6600023392245450 |
|          | 4           | 2.4134298940082100  | -1.4101541556909300              | 2.7574074609640900  |
|          | 5           | 3.1231543936206400  | 0.6405450339526510               | -1.0257868071392100 |
|          | 6           | -0.6935395833857340 | 0.9375327918316070               | -3.1395398566352300 |
|          | 7           | 0.2486680720378160  | -2.5836917390391000              | -0.8119880438636470 |
|          | 8           | -0.5580882922901840 | 1.3069291957066300               | 1.1912701572491500  |
| 9        | 1           | -3.3032464469116200 | 0.2917420212292050               | 2.9363166481559500  |
|          | 2           | -1.5012323282812300 | -0.5559555470316730              | -4.1298578706142000 |
|          | 3           | 0.4283245833309530  | 2.5141718671095300               | 3.6213146661812900  |
|          | 4           | 2.2303322616599500  | 1.6664667317860100               | -3.4448457251250600 |
|          | 5           | -2.5857391850902600 | -2.5076106054233300              | -0.3585862678048900 |
|          | 6           | 3.3851798035081300  | 1.0485301193706100               | 0.7374961337128960  |
|          | 7           | 0.5281717715832810  | -1.6774074948142400              | 2.5649652972043600  |
|          | 8           | 1.5814053005890600  | -2.1728715614296100              | -1.5650688277850800 |
|          | 9           | -0.7631957607769360 | 1.3929344692035000               | -0.3617340539252680 |
| 10       | 1           | -0.4379504512439080 | 4.4866399264090400               | -0.7572900287911340 |
|          | 2           | 1.7705190297462000  | -0.5507446244996850              | 4.1781777533970000  |
|          | 3           | -4.1853994807368000 | -1.8378381556393300              | -0.0029522050951005 |
|          | 4           | 3.0016532564339200  | 2.5285670123973200               | 1.2376344177707300  |
|          | 5           | -0.6087067185492540 | -3.5645492249102700              | 1.9643770805406100  |
|          | 6           | -2.7363860431743700 | 1.2885578935768000               | -2.7905415850355600 |
|          | 7           | 2.9126978009047300  | -1.7034716198314200              | 0.1877376687055550  |
|          | 8           | -0.5641808727601500 | -2.4548365086482900              | -2.2530750386737600 |
|          | 9           | 1.6234624921309100  | 1.2371956987822400               | -2.6934338325913100 |
|          | 10          | -0.7757090127512610 | 0.5704796019748930               | 0.9293657697729340  |
| 11       | 1           | 4.0974198452024100  | -0.8195641073781940              | 2.2079352841182200  |
|          | 2           | 0.7477625520986630  | 2.4445223503969600               | -3.9750010706719800 |
|          | 3           | 1.1631844793606500  | 2.3066172065229700               | 3.3997359850012900  |
|          | 4           | 1.8939225168093900  | <sup>3</sup> -3.8199003002971300 | -0.2304492794789040 |
|          | 5           | -0.7749047165040770 | 4.1951962313027000               | -0.1776794580860790 |
|          | 6           | -0.0441679546781038 | -1.9313132303877300              | -3.8078601789861100 |
|          | 7           | 0.0975355907323604  | -1.9628236790501800              | 3.3322118688052000  |

(Table continued.)

| <i>n</i> | Atom number | <i>x</i>            | <i>y</i>            | <i>z</i>            |
|----------|-------------|---------------------|---------------------|---------------------|
| 12       | 1           | 0.9927647482226990  | -2.9528046662657200 | 3.1326353879060400  |
|          | 2           | 2.0534546840629600  | 3.8470788203399700  | 0.7080656513199400  |
|          | 3           | -2.3311800135051900 | 3.3711363811666400  | 1.6489692801908500  |
|          | 4           | 4.1077771274180500  | -0.0613509481604760 | 1.6249612291887000  |
|          | 5           | -2.9867257038062400 | -0.8314395295439380 | 3.1474170852783700  |
|          | 6           | -0.8665463497811500 | 3.0689239149799100  | -2.4857249901447100 |
|          | 7           | 2.3768345203401000  | -3.1018054140268900 | -1.0380229122243500 |
|          | 8           | -1.9015271454121100 | -3.5662099094352100 | -0.1199109440973480 |
|          | 9           | 3.0164942946378700  | 0.9989423646137430  | -2.5001957387272100 |
|          | 10          | -3.9060594752317700 | 0.2475074224521470  | -1.0146480481799300 |
|          | 11          | -0.6351100414477480 | -1.1666006060608000 | -3.5496814989366300 |
|          | 12          | 0.0798233545025344  | 0.1466221699406260  | 0.4461354980376030  |

Comparison of the the anisotropy ( $\Delta\sigma$ , in ppm) and asymmetry parameter ( $\eta_\sigma$ ) of the  $^{129}\text{Xe}$  shielding tensor in  $\text{Xe}_n$  ( $n = 2 - 12$ ) as calculated quantum-chemically (QC) and from the different pairwise additive models, PAA(bin) and PAA(eff).

| $n$       | $G_s$       | Anisotropy $\Delta\sigma$ |          |       | Asymmetry parameter $\eta$ |          |        |
|-----------|-------------|---------------------------|----------|-------|----------------------------|----------|--------|
|           |             | PAA(bin)                  | PAA(eff) | QC    | PAA(bin)                   | PAA(eff) | QC     |
| 2         | $C_{2v}$    | 46.82                     | 30.50    | 46.51 | 0.0000                     | 0.0000   | 0.0000 |
| 3         | $C_{2v}$    | 58.53                     | 38.12    | 50.05 | 0.6000                     | 0.6000   | 0.3837 |
| 4         | $C_{3v}$    | 70.24                     | 45.74    | 53.86 | 0.0000                     | 0.0000   | 0.0000 |
| 5         | $C_{3v}$    | 71.30                     | 46.59    | 54.96 | 0.0000                     | 0.0000   | 0.0000 |
|           | $C_{2v}$    | 58.05                     | 37.69    | 39.29 | 1.0440                     | 1.0569   | 0.9545 |
| 6         | $C_{4v}$    | 49.78                     | 32.39    | 44.18 | 0.0000                     | 0.0000   | 0.0000 |
| 7         | $C_{2v}$    | 62.03                     | 40.85    | 44.04 | 0.8235                     | 0.8003   | 0.6523 |
|           | $C_{5v}$    | 11.97                     | 6.36     | 10.31 | 0.0001                     | 0.0002   | 0.0001 |
| 8         | $C_1(1)$    | 73.65                     | 48.43    | 57.98 | 0.0108                     | 0.0147   | 0.0097 |
|           | $C_1(2)$    | 63.17                     | 41.71    | 45.20 | 0.7786                     | 0.7478   | 0.5933 |
|           | $C_s(1)$    | 62.89                     | 41.54    | 44.89 | 0.8094                     | 0.7826   | 0.6331 |
|           | $C_s(2)$    | 39.37                     | 25.83    | 22.08 | 1.7615                     | 1.7569   | 1.9361 |
|           | $C_1(3)$    | 12.27                     | 6.60     | 10.57 | 0.1476                     | 0.2105   | 0.2038 |
|           | $C_1(4)$    | 47.18                     | 31.81    | 33.49 | -0.2670                    | -0.1861  | 0.0987 |
| 9         | $C_1$       | 65.35                     | 43.43    | 47.35 | 0.6863                     | 0.6397   | 0.4866 |
|           | $C_s(1)$    | 44.19                     | 29.68    | 26.95 | 1.4424                     | 1.3728   | 1.3522 |
|           | $C_s(2)$    | 12.76                     | 7.04     | 10.69 | 1.0097                     | 1.4065   | 1.0984 |
|           | $C_{2v}$    | 60.28                     | 40.88    | 38.40 | 0.6764                     | 0.7630   | 0.7237 |
| 10        | $C_s(1)$    | 69.39                     | 46.59    | 51.03 | 0.4992                     | 0.4250   | 0.2904 |
|           | $C_s(2)$    | 51.40                     | 35.28    | 33.36 | 1.0725                     | 0.9624   | 0.8475 |
|           | $C_s(3)$    | 16.14                     | 9.69     | 11.92 | 0.7857                     | 1.0170   | 0.9366 |
|           | $C_{3v}$    | 42.20                     | 30.15    | 24.77 | 3.0000                     | 3.0000   | 3.0000 |
| 11        | $C_s(1)$    | 71.37                     | 48.16    | 52.04 | 0.4502                     | 0.3685   | 0.2450 |
|           | $C_1$       | 57.20                     | 39.77    | 37.48 | 0.8522                     | 0.7383   | 0.6203 |
|           | $C_s(2)$    | 24.46                     | 16.11    | 15.48 | 0.7276                     | 0.8710   | 1.0028 |
|           | $C_s(3)$    | 21.85                     | 14.14    | 14.32 | 0.3321                     | 0.3918   | 0.4538 |
|           | $C_{2v}$    | 67.58                     | 46.30    | 38.65 | 1.6413                     | 1.7641   | 1.4895 |
| 12        | $C_s(1)$    | 64.13                     | 45.19    | 41.29 | 0.6291                     | 0.5182   | 0.4151 |
|           | $C_s(2)$    | 40.47                     | 28.78    | 23.64 | 0.0363                     | 0.0497   | 0.0472 |
|           | $C_{5v}(1)$ | 35.72                     | 25.04    | 20.84 | 0.0000                     | 0.0000   | 0.0000 |
|           | $C_{5v}(2)$ | 37.89                     | 26.97    | 14.66 | 2.9998                     | 2.9998   | 2.9991 |
| rms error |             | 16.15                     | 6.32     |       | 0.16                       | 0.13     |        |

As the previous table but for the nuclear quadrupole coupling tensor components  $\chi_{33}$  and  $\chi_{22}$  (in kHz).<sup>a</sup>

| $n$       | $G_s$       | Largest component $\chi_{33}$ |          |       | Second-largest component $\chi_{22}$ |          |       |
|-----------|-------------|-------------------------------|----------|-------|--------------------------------------|----------|-------|
|           |             | PAA(bin)                      | PAA(eff) | QC    | PAA(bin)                             | PAA(eff) | QC    |
| 2         | $C_{2v}$    | 2259                          | 1688     | 2257  | -1129                                | -844     | -1128 |
| 3         | $C_{2v}$    | 2823                          | 2111     | 2551  | -2259                                | -1688    | -2187 |
| 4         | $C_{3v}$    | 3388                          | 2533     | 2735  | -1694                                | -1266    | -1368 |
| 5         | $C_{3v}$    | 3441                          | 2591     | 2761  | -1721                                | -1296    | -1381 |
|           | $C_{2v}$    | -2866                         | -2153    | -2412 | 2796                                 | 2079     | 1968  |
| 6         | $C_{4v}$    | 2388                          | 1800     | 1635  | -1194                                | -900     | -818  |
| 7         | $C_{2v}$    | -2723                         | -2034    | -2220 | 3002                                 | 2293     | 2114  |
|           | $C_{5v}$    | 526                           | 259      | -440  | -263                                 | -130     | 232   |
| 8         | $C_1(1)$    | 3562                          | 2714     | 2858  | -1804                                | -1382    | -1481 |
|           | $C_1(2)$    | -2702                         | -2013    | -2185 | 3060                                 | 2348     | 2175  |
|           | $C_s(1)$    | -2740                         | -2051    | -2233 | 3047                                 | 2339     | 2146  |
|           | $C_s(2)$    | -2626                         | -1985    | -2014 | 1900                                 | 1445     | 1134  |
|           | $C_1(3)$    | 541                           | 280      | -455  | -224                                 | -95      | 286   |
|           | $C_1(4)$    | 2313                          | 1828     | 2336  | -892                                 | -822     | -1525 |
| 9         | $C_1$       | 3174                          | 2460     | 2279  | -2644                                | -1956    | -2119 |
|           | $C_s(1)$    | -2600                         | -1956    | -1983 | 2154                                 | 1702     | 1250  |
|           | $C_s(2)$    | 53                            | 151      | 570   | 566                                  | 324      | -467  |
|           | $C_{2v}$    | -2544                         | -2186    | -2962 | 2962                                 | 2361     | 2808  |
| 10        | $C_s(1)$    | 3386                          | 2665     | 2490  | -2480                                | -1795    | -1939 |
|           | $C_s(2)$    | -2561                         | -1912    | -1930 | 2532                                 | 2065     | 1635  |
|           | $C_s(3)$    | -39                           | 70       | 497   | 744                                  | 494      | -293  |
|           | $C_{3v}$    | -4248                         | -3648    | -4296 | 2124                                 | 1824     | 2149  |
| 11        | $C_s(1)$    | 3490                          | 2767     | 2612  | -2465                                | -1776    | -1932 |
|           | $C_1$       | -2550                         | -1917    | -1940 | 2834                                 | 2353     | 1937  |
|           | $C_s(2)$    | -1061                         | -916     | -564  | -119                                 | 8        | 450   |
|           | $C_s(3)$    | -334                          | -213     | 191   | -709                                 | -569     | -177  |
|           | $C_{2v}$    | -4493                         | -3868    | -4129 | 3335                                 | 2695     | 2725  |
| 12        | $C_s(1)$    | 3195                          | 2699     | 2294  | -2519                                | -1906    | -1928 |
|           | $C_s(2)$    | 2023                          | 1736     | 982   | -1056                                | -922     | -556  |
|           | $C_{5v}(1)$ | 1772                          | 1493     | 659   | -886                                 | -747     | -340  |
|           | $C_{5v}(2)$ | -3799                         | -3232    | -3053 | 1900                                 | 1616     | 1527  |
| rms error |             | 670                           | 416      |       | 635                                  | 370      |       |

<sup>a</sup> As  $\chi$  is a traceless tensor, the smallest (in absolute value) component can be obtained as

$$\chi_{11} = -(\chi_{22} + \chi_{33}).$$

As previous tables but for the total (in Hz) and electronic (in kHz a.u.) spin-rotation constants.<sup>a</sup>

| $n$       | $G_s$       | Total spin-rotation constant $C$ |          |       | Electronic spin-rotation constant $C^e$ |          |        |
|-----------|-------------|----------------------------------|----------|-------|-----------------------------------------|----------|--------|
|           |             | PAA(bin)                         | PAA(eff) | QC    | PAA(bin)                                | PAA(eff) | QC     |
| 2         | $C_{2v}$    | 21.84                            | 14.40    | 20.27 | 451.3                                   | 418.8    | 444.5  |
| 3         | $C_{2v}$    | 32.76                            | 21.64    | 28.74 | 902.6                                   | 837.6    | 875.2  |
| 4         | $C_{3v}$    | 32.76                            | 21.64    | 25.83 | 1353.9                                  | 1256.4   | 1293.1 |
| 5         | $C_{3v}$    | 21.04                            | 14.14    | 16.67 | 1583.8                                  | 1487.1   | 1518.8 |
|           | $C_{2v}$    | 30.53                            | 20.17    | 22.99 | 1806.8                                  | 1676.6   | 1711.1 |
| 6         | $C_{4v}$    | 22.73                            | 15.21    | 17.89 | 2076.2                                  | 1945.6   | 1992.2 |
| 7         | $C_{2v}$    | 16.46                            | 11.18    | 12.27 | 2263.3                                  | 2135.6   | 2158.8 |
|           | $C_{5v}$    | 25.36                            | 16.80    | 17.70 | 2723.2                                  | 2525.9   | 2546.1 |
| 8         | $C_1(1)$    | 10.17                            | 6.77     | 7.56  | 2224.1                                  | 2114.7   | 2138.2 |
|           | $C_1(2)$    | 12.74                            | 8.39     | 9.27  | 2454.2                                  | 2313.9   | 2339.3 |
|           | $C_s(1)$    | 13.11                            | 9.00     | 9.62  | 2486.1                                  | 2358.7   | 2376.1 |
|           | $C_s(2)$    | 15.91                            | 10.75    | 11.49 | 2719.1                                  | 2558.2   | 2578.7 |
|           | $C_1(3)$    | 19.54                            | 13.07    | 13.56 | 2953.8                                  | 2757.0   | 2771.3 |
|           | $C_1(4)$    | 22.25                            | 14.78    | 15.33 | 3191.3                                  | 2958.7   | 2975.9 |
| 9         | $C_1$       | 10.87                            | 7.22     | 7.76  | 2671.4                                  | 2531.8   | 2550.3 |
|           | $C_s(1)$    | 13.11                            | 8.95     | 9.35  | 2936.8                                  | 2779.0   | 2792.2 |
|           | $C_s(2)$    | 16.27                            | 10.98    | 11.23 | 3184.7                                  | 2988.7   | 2997.3 |
|           | $C_{2v}$    | 21.37                            | 14.26    | 14.39 | 3675.3                                  | 3405.0   | 3408.2 |
| 10        | $C_s(1)$    | 9.19                             | 6.15     | 6.43  | 2877.8                                  | 2739.7   | 2750.7 |
|           | $C_s(2)$    | 10.78                            | 7.14     | 7.46  | 3107.5                                  | 2941.0   | 2952.7 |
|           | $C_s(3)$    | 13.71                            | 9.34     | 9.37  | 3411.8                                  | 3217.1   | 3218.2 |
|           | $C_{3v}$    | 21.23                            | 14.29    | 14.06 | 4205.3                                  | 3889.8   | 3876.5 |
| 11        | $C_s(1)$    | 8.06                             | 5.37     | 5.50  | 3081.0                                  | 2940.0   | 2946.1 |
|           | $C_1$       | 9.25                             | 6.16     | 6.26  | 3306.9                                  | 3143.2   | 3146.9 |
|           | $C_s(2)$    | 11.64                            | 7.74     | 7.75  | 3589.0                                  | 3383.8   | 3383.0 |
|           | $C_s(3)$    | 11.75                            | 8.07     | 7.91  | 3634.0                                  | 3441.3   | 3433.7 |
|           | $C_{2v}$    | 21.49                            | 14.61    | 14.01 | 4766.7                                  | 4401.0   | 4366.0 |
| 12        | $C_s(1)$    | 8.13                             | 5.44     | 5.39  | 3504.1                                  | 3345.1   | 3341.8 |
|           | $C_s(2)$    | 10.04                            | 6.70     | 6.49  | 3778.2                                  | 3580.7   | 3567.4 |
|           | $C_{5v}(1)$ | 10.25                            | 7.07     | 6.72  | 3831.0                                  | 3643.7   | 3625.1 |
|           | $C_{5v}(2)$ | 23.74                            | 16.43    | 15.10 | 5449.3                                  | 5014.1   | 4932.9 |
| rms error |             | 4.99                             | 2.06     |       | 196.24                                  | 25.81    |        |

<sup>a</sup> The electronic spin-rotation constants are presented without the appropriate  $I^{-1}$  factor.

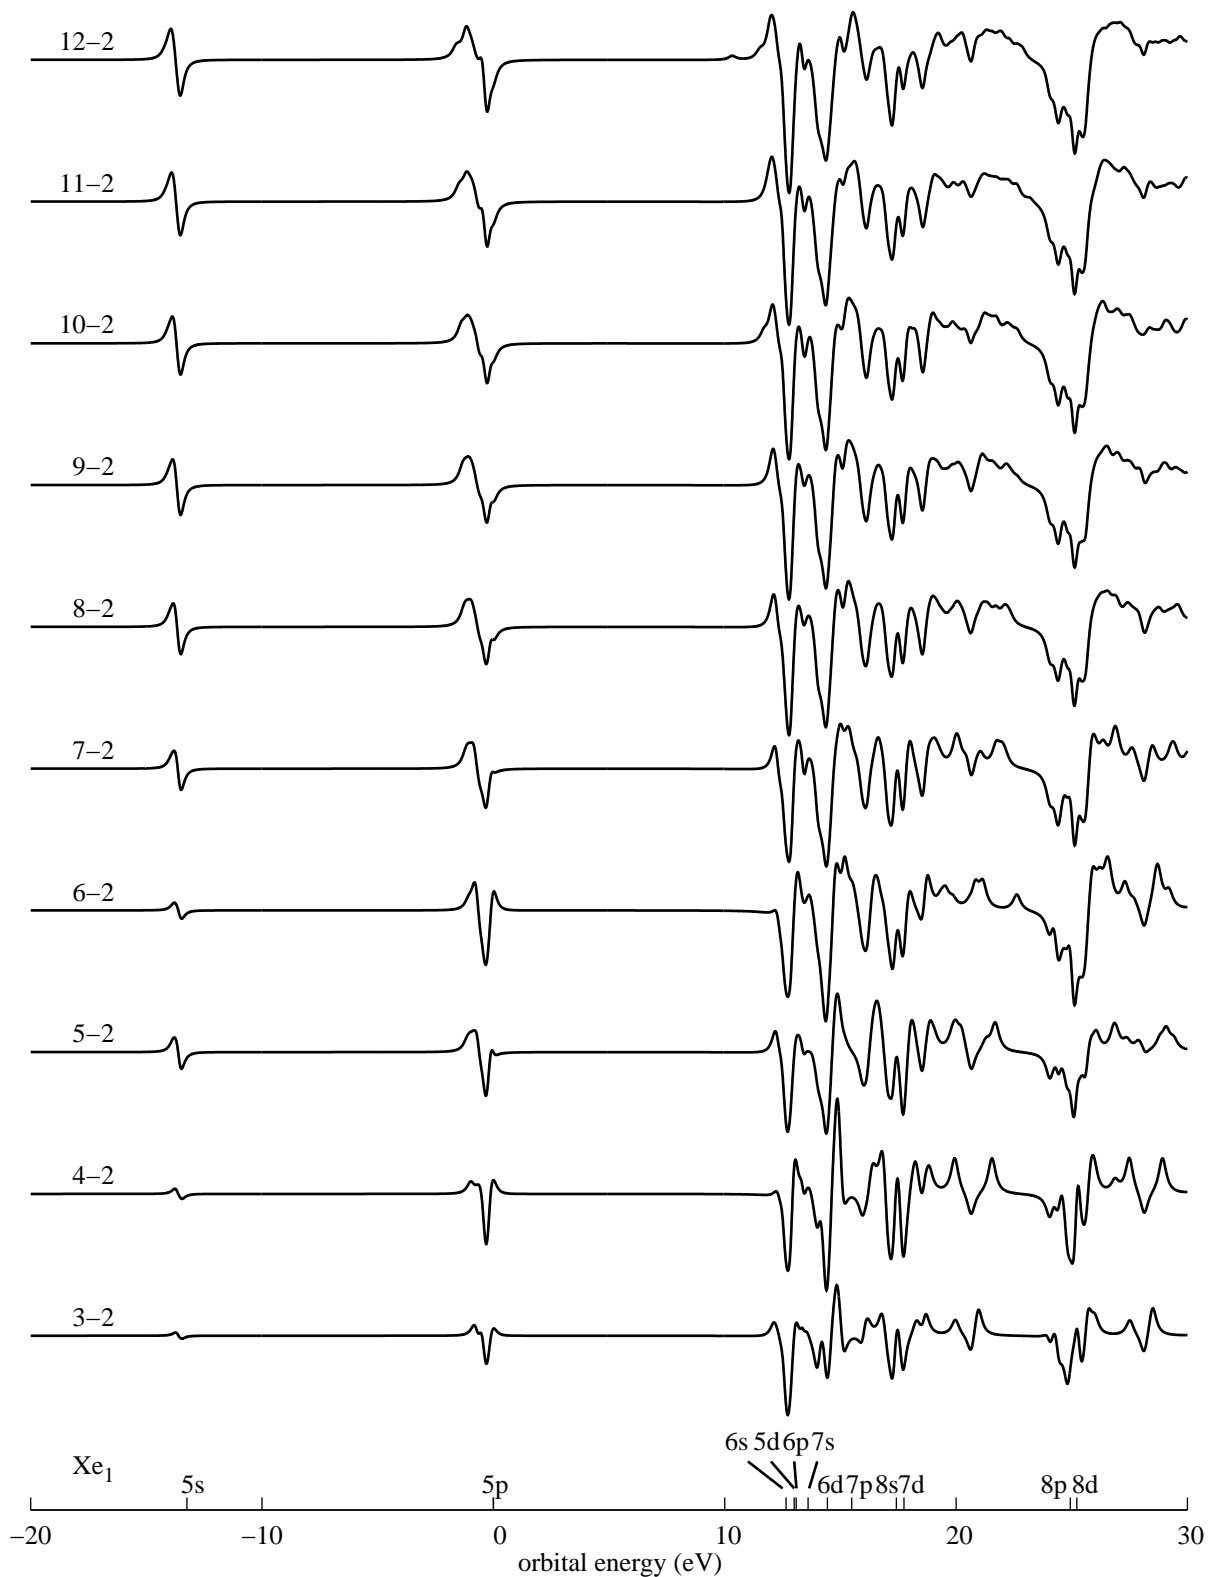

Normalized difference in the density of states (DOS) in the valence region of Lennard-Jones clusters  $\text{Xe}_n$  and xenon dimer  $\text{Xe}_2$ ,  $\frac{2}{n} \times \text{DOS}(\text{Xe}_n) - \text{DOS}(\text{Xe}_2)$ , ( $n = 3 - 12$ ) estimated using Lorentzian broadening (width = 0.2 eV) of Hartree-Fock orbital energies. The ticks for  $\text{Xe}_1$  as in Fig. 6 of the article.



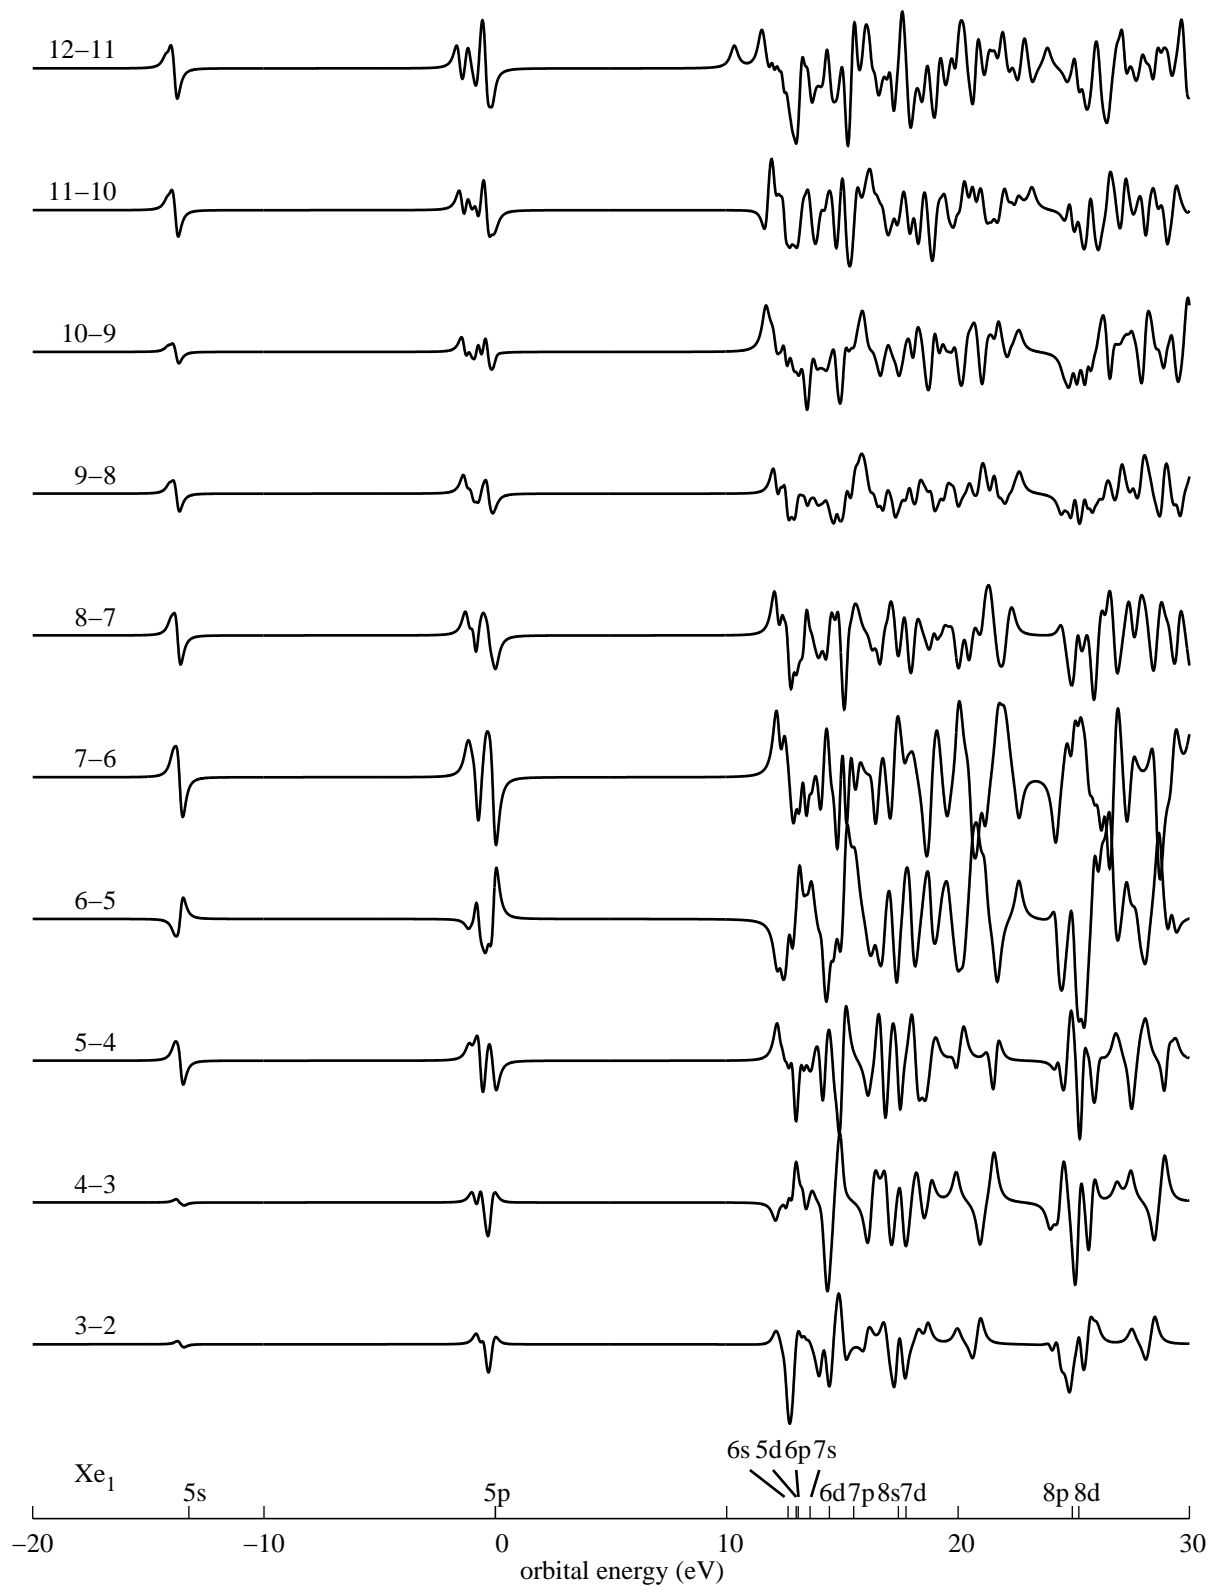

As the previous figure but for the normalized difference in the density of states (DOS) of successive Lennard-Jones clusters,  $\frac{n-1}{n} \times \text{DOS}(\text{Xe}_n) - \text{DOS}(\text{Xe}_{n-1})$ .
